# Supplementary material for: Pathogens and insect herbivores drive rainforest plant diversity and composition
Source: Springer Nature journal article supplement (doi:10.1038/nature12911), 2014-01-22
Supplement: 41586_2014_BFnature12911_MOESM243_ESM.pdf [file 41586_2014_BFnature12911_MOESM243_ESM.pdf]

# SUPPLEMENTARY INFORMATION

doi:10.1038/nature12911

**Supplementary Table 1:** Model coefficients ( $\pm$  standard deviation) for each species relating numbers of seedlings to the number of seeds for each pesticide treatment. The parameters are described in equation 2 of the Methods. Values of  $\beta_L$  less than 1 indicate negative density dependence.

| Species                    | Family        | Seed abundance | Parameter                  | Seeds               | Control              | Insecticide          | Fungicide            |                      |
|----------------------------|---------------|----------------|----------------------------|---------------------|----------------------|----------------------|----------------------|----------------------|
|                            |               |                |                            | Trap                | Water                | Engeo®               | Amistar®             | Ridomil®             |
| <i>Acacia polyphylla</i>   | Fabaceae      | 1888           | $\alpha_L$                 |                     | -0.7007 $\pm$ 0.3370 | -0.1761 $\pm$ 0.2965 | -1.4313 $\pm$ 0.3995 | -1.3364 $\pm$ 0.4349 |
|                            |               |                | $\beta_L$                  |                     | 0.8342 $\pm$ 0.1078  | 0.8495 $\pm$ 0.0948  | 1.1043 $\pm$ 0.1214  | 1.1206 $\pm$ 0.1433  |
|                            |               |                | $\kappa_{t,L}$             | 4.4072 $\pm$ 1.1924 | 3.0451 $\pm$ 1.3807  | 3.4851 $\pm$ 1.4483  | 3.0796 $\pm$ 1.3464  | 1.9891 $\pm$ 0.9570  |
|                            |               |                | $\bar{\lambda} \pm \sigma$ | 4.2196 $\pm$ 2.2442 |                      |                      |                      |                      |
| <i>Bauhinia</i> sp.        | Fabaceae      | 327            | $\alpha_L$                 |                     | -2.5592 $\pm$ 0.7633 | -1.8863 $\pm$ 0.6298 | -2.1399 $\pm$ 0.6494 | -2.9217 $\pm$ 0.7770 |
|                            |               |                | $\beta_L$                  |                     | 1.1596 $\pm$ 0.2284  | 1.2195 $\pm$ 0.2162  | 1.2410 $\pm$ 0.2223  | 1.3796 $\pm$ 0.2255  |
|                            |               |                | $\kappa_{t,L}$             | 2.3037 $\pm$ 1.0362 | 1.0829 $\pm$ 0.9947  | 1.4381 $\pm$ 1.2701  | 1.4871 $\pm$ 1.3321  | 1.5951 $\pm$ 1.3292  |
|                            |               |                | $\bar{\lambda} \pm \sigma$ | 1.3015 $\pm$ 1.3868 |                      |                      |                      |                      |
| Unknown sp1                | Sapindaceae   | 459            | $\alpha_L$                 |                     | -3.1189 $\pm$ 0.7033 | -2.7350 $\pm$ 0.6952 | -3.2314 $\pm$ 0.7069 | -3.0192 $\pm$ 0.6880 |
|                            |               |                | $\beta_L$                  |                     | 1.0422 $\pm$ 0.2925  | 0.8963 $\pm$ 0.3035  | 0.8689 $\pm$ 0.2911  | 0.8950 $\pm$ 0.2948  |
|                            |               |                | $\kappa_{t,L}$             | 3.7283 $\pm$ 1.1157 | 0.7023 $\pm$ 0.7942  | 0.5243 $\pm$ 0.7270  | 1.0274 $\pm$ 0.9194  | 0.8395 $\pm$ 0.9340  |
|                            |               |                | $\bar{\lambda} \pm \sigma$ | 2.4986 $\pm$ 1.2358 |                      |                      |                      |                      |
| <i>Mascagnia</i> sp.       | Malpighiaceae | 313            | $\alpha_L$                 |                     | -3.8680 $\pm$ 1.4088 | -1.1614 $\pm$ 0.5402 | -2.2681 $\pm$ 0.6608 | -3.4206 $\pm$ 0.8631 |
|                            |               |                | $\beta_L$                  |                     | 0.7640 $\pm$ 0.3021  | 0.7901 $\pm$ 0.2241  | 0.9584 $\pm$ 0.2416  | 1.1441 $\pm$ 0.2663  |
|                            |               |                | $\kappa_{t,L}$             | 4.5101 $\pm$ 1.7217 | 0.7415 $\pm$ 0.8226  | 1.0214 $\pm$ 0.9039  | 1.2384 $\pm$ 1.0928  | 1.3867 $\pm$ 1.1729  |
|                            |               |                | $\bar{\lambda} \pm \sigma$ | 1.6781 $\pm$ 1.3922 |                      |                      |                      |                      |
| <i>Brosimum alicastrum</i> | Moraceae      | 75             | $\alpha_L$                 |                     | -1.2528 $\pm$ 0.5774 | -1.2528 $\pm$ 0.5796 | -0.8477 $\pm$ 0.5374 | -0.8494 $\pm$ 0.7072 |
|                            |               |                | $\beta_L$                  |                     | 0.9966 $\pm$ 0.3162  | 0.9958 $\pm$ 0.3162  | 0.9956 $\pm$ 0.3162  | 0.9962 $\pm$ 0.3163  |
|                            |               |                | $\kappa_{t,L}$             | 0.0696 $\pm$ 0.0286 | 1.3719 $\pm$ 1.0968  | 1.3854 $\pm$ 1.1072  | 1.0263 $\pm$ 0.9422  | 0.5556 $\pm$ 0.7257  |
|                            |               |                | $\bar{\lambda} \pm \sigma$ | 1.0000 $\pm$ 0.0073 |                      |                      |                      |                      |

| Species                           | Family        | Seed abundance | Parameter                  | Seeds                | Control              | Insecticide          | Fungicide            |                      |
|-----------------------------------|---------------|----------------|----------------------------|----------------------|----------------------|----------------------|----------------------|----------------------|
|                                   |               |                |                            | Trap                 | Water                | Engeo®               | Amistar®             | Ridomil®             |
| <i>Combretum laxum/fruticosum</i> | Combretaceae  | 7258           | $\alpha_L$                 |                      | -4.6392 $\pm$ 1.1606 | -0.6446 $\pm$ 0.4862 | -4.7470 $\pm$ 1.2371 | -3.5474 $\pm$ 0.9744 |
|                                   |               |                | $\beta_L$                  |                      | 0.8792 $\pm$ 0.2543  | 0.8291 $\pm$ 0.1161  | 0.9068 $\pm$ 0.2791  | 0.8168 $\pm$ 0.221   |
|                                   |               |                | $\kappa_{t,L}$             | 7.5629 $\pm$ 1.4570  | 1.4475 $\pm$ 1.0776  | 3.3378 $\pm$ 1.0211  | 0.5772 $\pm$ 0.5545  | 1.7280 $\pm$ 1.0534  |
|                                   |               |                | $\bar{\lambda} \pm \sigma$ | 42.4915 $\pm$ 3.8096 |                      |                      |                      |                      |
| <i>Cordia alliodora</i>           | Boraginaceae  | 952            | $\alpha_L$                 |                      | 0.0810 $\pm$ 0.2797  | 0.7709 $\pm$ 0.2458  | 0.4081 $\pm$ 0.2754  | 0.4221 $\pm$ 0.2967  |
|                                   |               |                | $\beta_L$                  |                      | 0.7648 $\pm$ 0.1161  | 0.7755 $\pm$ 0.1062  | 0.6374 $\pm$ 0.1174  | 0.6656 $\pm$ 0.1273  |
|                                   |               |                | $\kappa_{t,L}$             | 3.7795 $\pm$ 1.1493  | 3.2008 $\pm$ 1.2824  | 2.8348 $\pm$ 1.0199  | 1.9420 $\pm$ 0.7301  | 1.5510 $\pm$ 0.5725  |
|                                   |               |                | $\bar{\lambda} \pm \sigma$ | 3.3751 $\pm$ 1.9488  |                      |                      |                      |                      |
| <i>Cryosophila stauracantha</i>   | Arecaceae     | 3657           | $\alpha_L$                 |                      | 0.7816 $\pm$ 0.4400  | -0.9457 $\pm$ 0.5957 | -0.9614 $\pm$ 0.5556 | 0.1106 $\pm$ 0.5778  |
|                                   |               |                | $\beta_L$                  |                      | 0.4758 $\pm$ 0.1472  | 0.9020 $\pm$ 0.1697  | 0.9434 $\pm$ 0.1467  | 0.7676 $\pm$ 0.1695  |
|                                   |               |                | $\kappa_{t,L}$             | 0.4526 $\pm$ 0.0832  | 0.5873 $\pm$ 0.1935  | 0.4429 $\pm$ 0.1892  | 0.7152 $\pm$ 0.3197  | 0.4145 $\pm$ 0.1460  |
|                                   |               |                | $\bar{\lambda} \pm \sigma$ | 5.5161 $\pm$ 2.6235  |                      |                      |                      |                      |
| <i>Dioscorea</i> sp.              | Dioscoreaceae | 72             | $\alpha_L$                 |                      | 0.2233 $\pm$ 0.3601  | 0.6718 $\pm$ 0.2608  | 0.1244 $\pm$ 0.3176  | -0.1779 $\pm$ 0.3316 |
|                                   |               |                | $\beta_L$                  |                      | 1.0628 $\pm$ 0.2640  | 1.0731 $\pm$ 0.2151  | 1.1689 $\pm$ 0.2394  | 0.8726 $\pm$ 0.2428  |
|                                   |               |                | $\kappa_{t,L}$             | 1.7943 $\pm$ 0.9014  | 1.2583 $\pm$ 0.8475  | 3.1883 $\pm$ 1.5717  | 2.3019 $\pm$ 1.2823  | 1.9292 $\pm$ 1.1728  |
|                                   |               |                | $\bar{\lambda} \pm \sigma$ | 0.7952 $\pm$ 0.9676  |                      |                      |                      |                      |
| <i>Forsteronia</i> sp.            | Apocynaceae   | 1012           | $\alpha_L$                 |                      | -0.6691 $\pm$ 0.3839 | 0.2334 $\pm$ 0.3183  | -0.4412 $\pm$ 0.3683 | -0.5541 $\pm$ 0.3872 |
|                                   |               |                | $\beta_L$                  |                      | 0.7841 $\pm$ 0.1617  | 0.8986 $\pm$ 0.1352  | 0.6978 $\pm$ 0.1631  | 0.6571 $\pm$ 0.1649  |
|                                   |               |                | $\kappa_{t,L}$             | 7.4343 $\pm$ 2.0410  | 2.9405 $\pm$ 1.2453  | 2.7790 $\pm$ 0.9922  | 2.3109 $\pm$ 0.9644  | 2.3031 $\pm$ 1.0074  |
|                                   |               |                | $\bar{\lambda} \pm \sigma$ | 5.2922 $\pm$ 1.9808  |                      |                      |                      |                      |

| Species                       | Family       | Seed abundance | Parameter                  | Seeds           | Control          | Insecticide      | Fungicide        |                  |
|-------------------------------|--------------|----------------|----------------------------|-----------------|------------------|------------------|------------------|------------------|
|                               |              |                |                            | Trap            | Water            | Engeo®           | Amistar®         | Ridomil®         |
| <i>Hippocratea volubilis</i>  | Celastraceae | 50             | $\alpha_L$                 |                 | -1.6602 ± 0.8066 | -0.4056 ± 0.3203 | -1.946 ± 0.6419  | -1.4361 ± 0.643  |
|                               |              |                | $\beta_L$                  |                 | 0.9995 ± 0.3162  | 0.9989 ± 0.3162  | 0.9985 ± 0.3162  | 0.9992 ± 0.3162  |
|                               |              |                | $\kappa_{t,L}$             | 0.4974 ± 0.1997 | 0.4882 ± 0.9404  | 2.0313 ± 1.2358  | 1.1406 ± 1.0024  | 0.6046 ± 0.8311  |
|                               |              |                | $\bar{\lambda} \pm \sigma$ | 1.0000 ± 0.0073 |                  |                  |                  |                  |
| <i>Lonchocarpus castilloi</i> | Fabaceae     | 74             | $\alpha_L$                 |                 | -2.4476 ± 1.0377 | -1.3322 ± 0.8952 | -1.7791 ± 1.0027 | -0.9568 ± 0.8031 |
|                               |              |                | $\beta_L$                  |                 | 1.0545 ± 0.2916  | 0.9394 ± 0.2905  | 0.8666 ± 0.3032  | 0.8352 ± 0.3004  |
|                               |              |                | $\kappa_{t,L}$             | 2.1218 ± 1.3149 | 1.3039 ± 1.0597  | 0.8127 ± 0.8184  | 0.8905 ± 0.8732  | 0.8763 ± 0.8644  |
|                               |              |                | $\bar{\lambda} \pm \sigma$ | 0.8643 ± 1.083  |                  |                  |                  |                  |
| <i>Paullinia</i> sp.          | Sapindaceae  | 181            | $\alpha_L$                 |                 | -1.6194 ± 0.4483 | -0.6104 ± 0.3446 | -2.0294 ± 0.5196 | -2.2982 ± 0.5953 |
|                               |              |                | $\beta_L$                  |                 | 0.9975 ± 0.2768  | 0.5516 ± 0.3002  | 0.8906 ± 0.2914  | 0.976 ± 0.2971   |
|                               |              |                | $\kappa_{t,L}$             | 1.0488 ± 0.3967 | 1.6869 ± 1.1594  | 1.162 ± 0.8911   | 1.4835 ± 1.1047  | 1.0011 ± 0.8786  |
|                               |              |                | $\bar{\lambda} \pm \sigma$ | 1.1772 ± 0.8154 |                  |                  |                  |                  |
| <i>Pseudolmedia spuria</i>    | Moraceae     | 928            | $\alpha_L$                 |                 | -0.6092 ± 0.3985 | -0.2331 ± 0.352  | 0.1008 ± 0.3382  | -0.0299 ± 0.4225 |
|                               |              |                | $\beta_L$                  |                 | 0.7594 ± 0.2092  | 0.5405 ± 0.2422  | 0.6607 ± 0.1982  | 0.7264 ± 0.2124  |
|                               |              |                | $\kappa_{t,L}$             | 0.7839 ± 0.3006 | 0.8055 ± 0.4614  | 0.6923 ± 0.3815  | 0.7076 ± 0.3362  | 0.41 ± 0.2035    |
|                               |              |                | $\bar{\lambda} \pm \sigma$ | 0.9189 ± 1.5044 |                  |                  |                  |                  |
| <i>Psychotria</i> sp.         | Rubiaceae    | 100            | $\alpha_L$                 |                 | 1.7376 ± 0.2282  | 0.8635 ± 0.2775  | 2.0574 ± 0.2479  | 1.8744 ± 0.2453  |
|                               |              |                | $\beta_L$                  |                 | 1.2848 ± 0.2049  | 0.8866 ± 0.2613  | 1.14 ± 0.2257    | 1.0045 ± 0.2296  |
|                               |              |                | $\kappa_{t,L}$             | 0.7528 ± 0.2847 | 2.5014 ± 1.198   | 0.7738 ± 0.2953  | 1.4254 ± 0.5775  | 1.0291 ± 0.3582  |
|                               |              |                | $\bar{\lambda} \pm \sigma$ | 0.8025 ± 0.9028 |                  |                  |                  |                  |

| Species                        | Family        | Seed abundance | Parameter                  | Seeds             | Control          | Insecticide      | Fungicide        |                  |
|--------------------------------|---------------|----------------|----------------------------|-------------------|------------------|------------------|------------------|------------------|
|                                |               |                |                            | Trap              | Water            | Engeo®           | Amistar®         | Ridomil®         |
| <i>Serjania</i> sp. ("medium") | Sapindaceae   | 915            | $\alpha_L$                 |                   | -2.1579 ± 0.5893 | -0.5544 ± 0.3681 | -4.1191 ± 0.8805 | -1.9105 ± 0.5341 |
|                                |               |                | $\beta_L$                  |                   | 0.5754 ± 0.2649  | 0.8055 ± 0.16    | 1.0321 ± 0.272   | 0.2895 ± 0.2342  |
|                                |               |                | $\kappa_{t,L}$             | 3.6071 ± 0.996    | 0.9359 ± 0.8816  | 1.8336 ± 0.8335  | 1.4113 ± 1.0951  | 1.3463 ± 1.0718  |
|                                |               |                | $\bar{\lambda} \pm \sigma$ | 3.6782 ± 1.791    |                  |                  |                  |                  |
| <i>Spondias radlkoferi</i>     | Anacardiaceae | 111            | $\alpha_L$                 |                   | -1.6599 ± 0.6306 | -1.5313 ± 0.7443 | -1.4812 ± 0.7118 | -0.8266 ± 0.4449 |
|                                |               |                | $\beta_L$                  |                   | 0.9117 ± 0.2819  | 1.0157 ± 0.2848  | 1.0782 ± 0.2919  | 0.6746 ± 0.2751  |
|                                |               |                | $\kappa_{t,L}$             | 1.3576 ± 0.6761   | 1.1116 ± 1.0083  | 0.6792 ± 0.9091  | 0.6182 ± 0.7649  | 1.5654 ± 1.1172  |
|                                |               |                | $\bar{\lambda} \pm \sigma$ | 1.0044 ± 1.0342   |                  |                  |                  |                  |
| <i>Terminalia amazonia</i>     | Combretaceae  | 99409          | $\alpha_L$                 |                   | -2.5359 ± 1.0583 | -1.8484 ± 0.7191 | -4.5784 ± 1.1829 | -5.0081 ± 1.1349 |
|                                |               |                | $\beta_L$                  |                   | 0.4590 ± 0.1629  | 0.7323 ± 0.1119  | 0.802 ± 0.1782   | 0.8165 ± 0.1671  |
|                                |               |                | $\kappa_{t,L}$             | 8.7143 ± 1.4565   | 1.3916 ± 0.6971  | 1.8057 ± 0.4655  | 1.2061 ± 0.4725  | 1.6538 ± 0.865   |
|                                |               |                | $\bar{\lambda} \pm \sigma$ | 480.3949 ± 6.1436 |                  |                  |                  |                  |
